# Supplementary material for: Targeted UPLC-MS Metabolic Analysis of Human Faeces Reveals Novel Low-Invasive Candidate Markers for Colorectal Cancer
Source: MDPI journal article supplement (doi:10.3390/cancers10090300), 2018-09-01
Supplement: s1 [file s1]

# Targeted UPLC-MS Metabolic Analysis of Human Faeces Reveals Novel Low-Invasive Candidate Markers for Colorectal Cancer

Joaquin Cubiella, Marc Clos-Garcia, Cristina Alonso, Ibon Martinez-Arranz, Miriam Perez-Cormenzana, Ziortza Barrenetxea, Jesus Berganza, Isabel Rodríguez-Llopis, Mauro D'Amato, Luis Bujanda, Marta Diaz-Ondina and Juan M. Falcón-Pérez

## Supplementary Materials

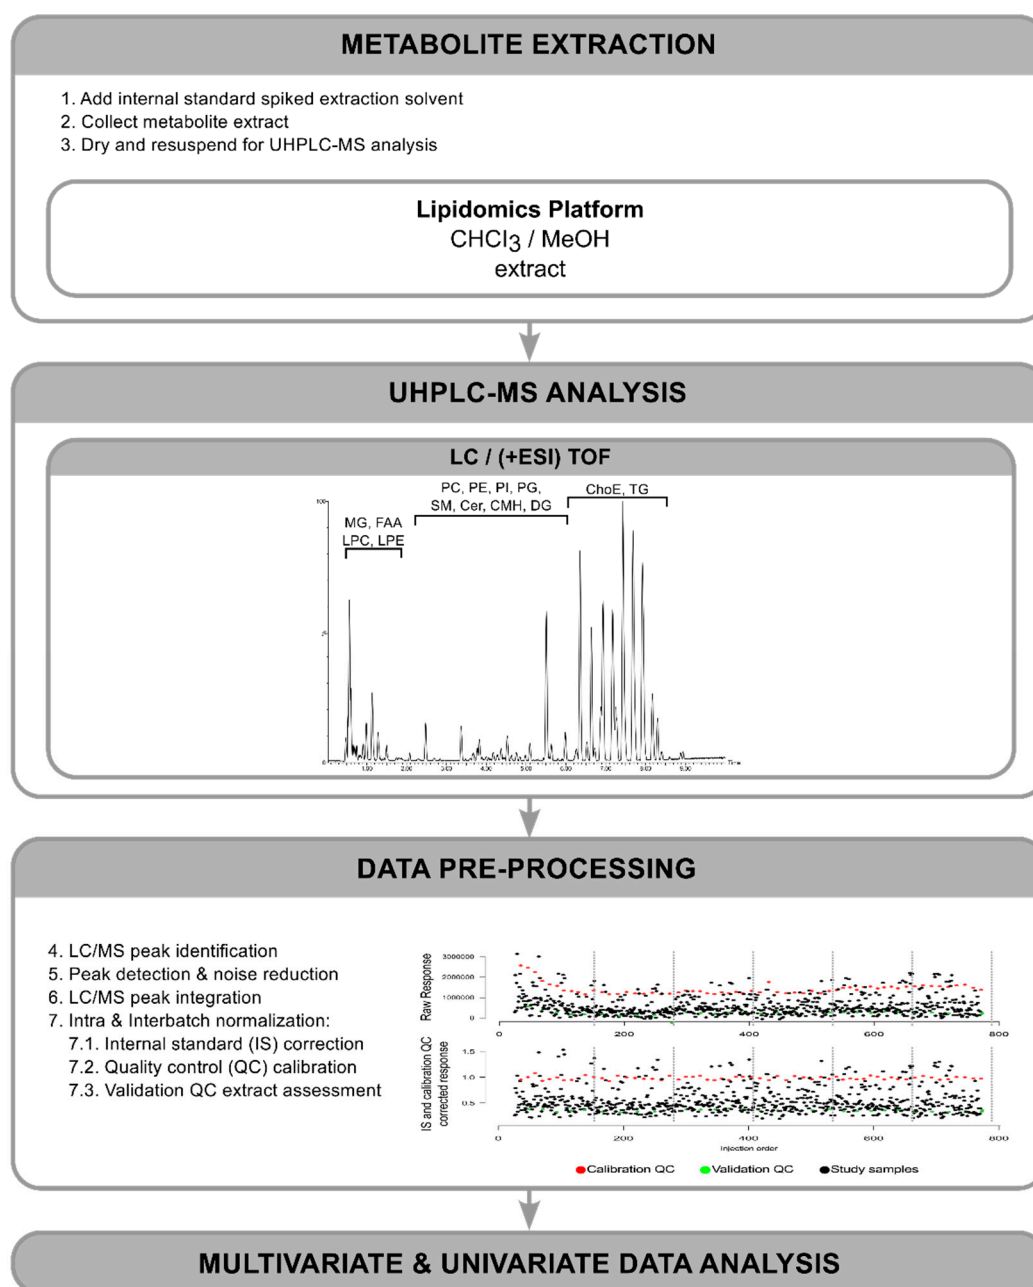

**Figure S1.** Workflow of the UPLC-MS-based targeted metabolomic profiling.

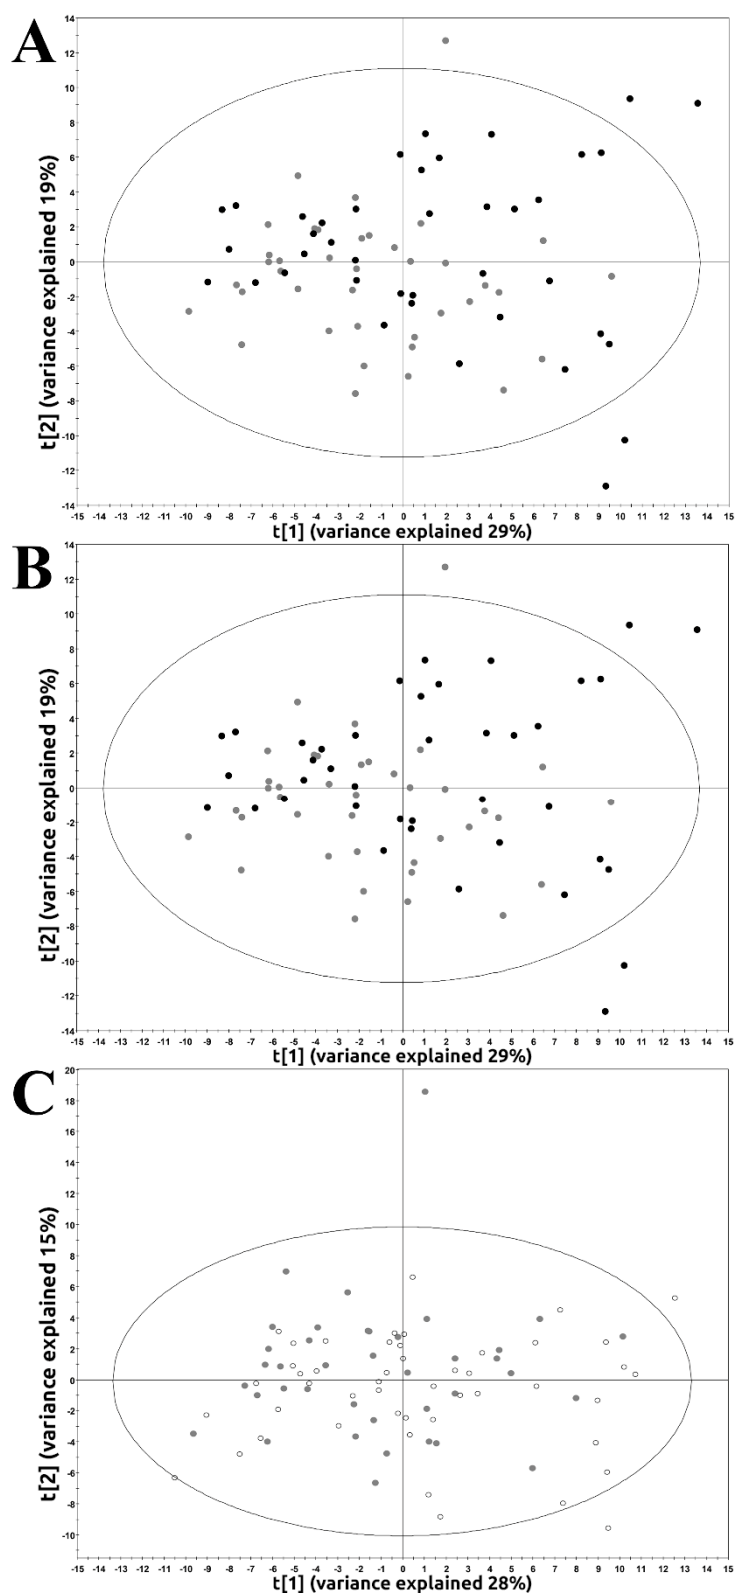

**Figure S2.** Multivariate analysis of paired group. (A) CRC vs. AD:  $R^2X = 0.29$  and  $Q^2 = 0.24$   $t[2]$ :  $R^2X = 0.19$  and  $Q^2 = 0.22$ . Black CRC, grey AD. (B) CRC vs. control:  $R^2X = 0.30$  and  $Q^2 = 0.25$ ,  $t[2]$ :  $R^2X = 0.19$  and  $Q^2 = 0.24$ . Black CRC, white healthy. (C) AD vs. control:  $R^2X = 0.28$  and  $Q^2 = 0.24$ ,  $t[2]$ :  $R^2X = 0.15$  and  $Q^2 = 0.15$ . Grey AD, white healthy.

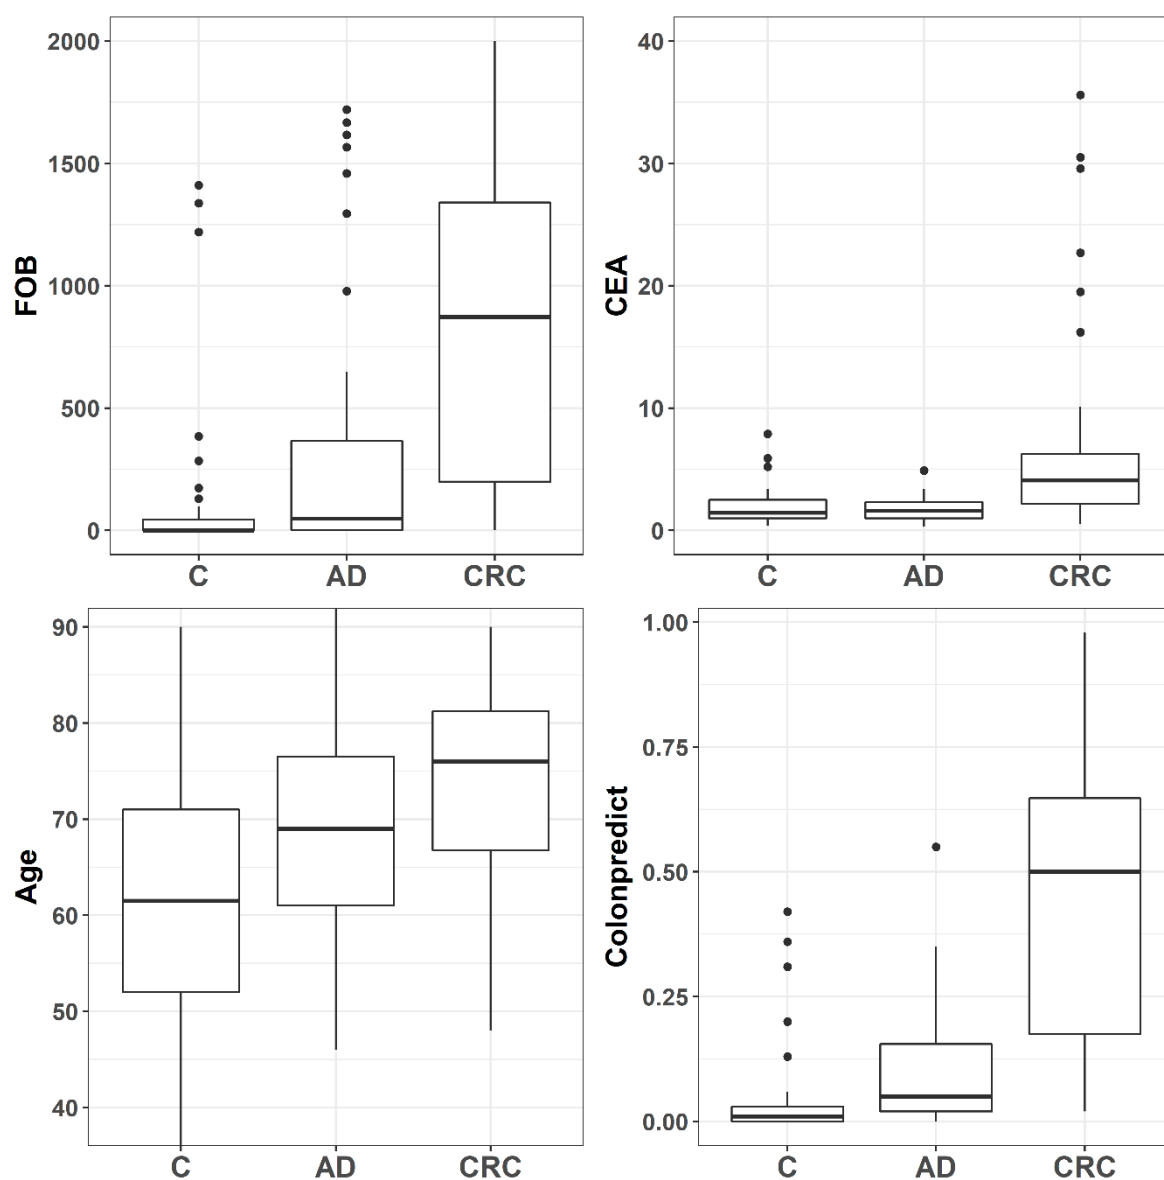

**Figure S3.** Boxplot representation of the clinical parameters distribution on the distinct groups of samples (C, AD and CRC).

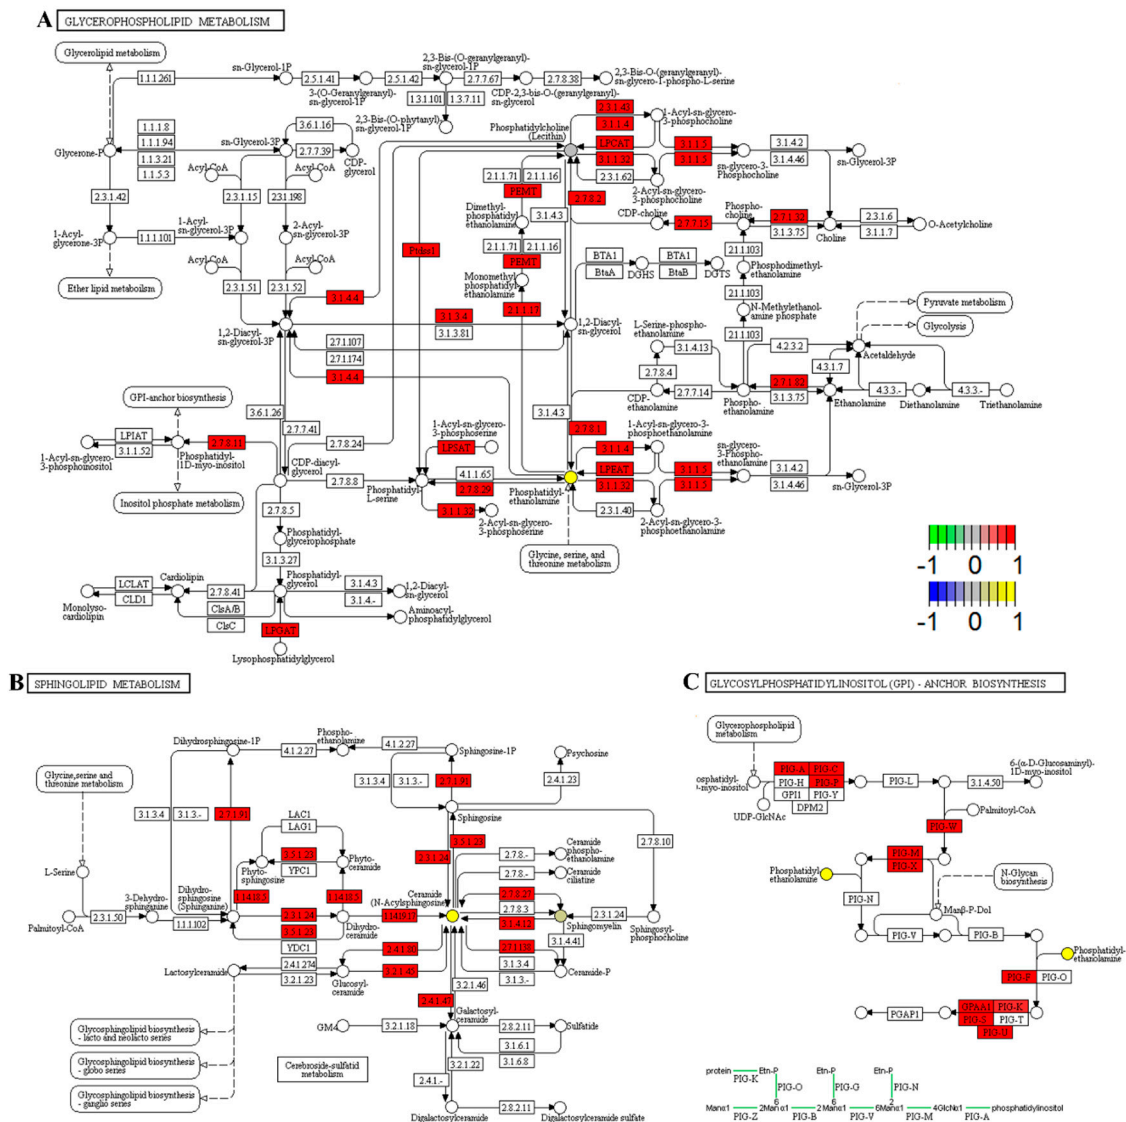

**Figure S4.** Mapping of altered genes and metabolites into the three metabolic pathways identified: sphingolipid metabolism (A), glycerophospholipid metabolism (B) and glycosylphosphatidylinositol (GPI)-anchor biosynthesis (C). Genes detected are coloured in a range green-red, depending on the Fold Change and metabolites in a range blue-yellow.

**Table S2:** Metabolites differentially expressed between control, AD and CRC groups (ANOVA test).

| Family | Metabolite                         | <i>p</i> -Value      |
|--------|------------------------------------|----------------------|
| Cer    | Cer (42:3)                         | $0.3 \times 10^{-5}$ |
|        | Cer (d18:1/16:0)                   | 0.015                |
|        | Cer (d18:1/24:1) + Cer(d18:2/24:0) | 0.008                |
| ChoE   | ChoE (16:0)                        | 0.001                |
|        | ChoE (18:2)                        | $0.3 \times 10^{-7}$ |
|        | ChoE (20:4)                        | $0.7 \times 10^{-7}$ |
| DG     | DG (32:1)                          | 0.042                |
| PC     | PC (16:0/16:0)                     | 0.002                |
|        | PC (16:0/18:0)                     | 0.003                |
|        | PC (16:0/18:1)                     | 0.026                |
|        | PC (18:0/18:1)                     | 0.006                |
|        | PC (18:0/20:4)                     | 0.016                |
|        | PC (32:1)                          | 0.005                |
|        | PC (36:3)                          | 0.028                |
|        | PC-O (16:0/16:0)                   | $0.1 \times 10^{-3}$ |
|        | PC-O (34:1)                        | 0.034                |
|        | PC-P (16:0/20:3)                   | 0.008                |
| PE     | PE (16:0/18:1)                     | 0.003                |
|        | PE (16:0/18:2)                     | 0.037                |
| SM     | SM (42:1)                          | $0.2 \times 10^{-3}$ |
|        | SM (42:3)                          | $0.1 \times 10^{-5}$ |
|        | SM (d18:1/16:0)                    | $0.8 \times 10^{-4}$ |
|        | SM (d18:1/18:0)                    | 0.027                |
|        | SM (d18:1/22:0)                    | 0.005                |
|        | SM (d18:1/23:0)                    | $0.2 \times 10^{-3}$ |
|        | SM (d18:1/24:1) + SM (d18:2/24:0)  | $0.4 \times 10^{-5}$ |
| TG     | TG (49:1)                          | 0.032                |
|        | TG (51:2)                          | 0.046                |
